# Supplementary material for: Inversion of dispersed Love wave phase velocity data for multiple continuous parameters
Source: MDPI journal article supplement (doi:10.3390/cancers14184512), 1985-01-01

Figure S1: The whole blot (uncropped blots) showing all the bands with all molecular weight markers.

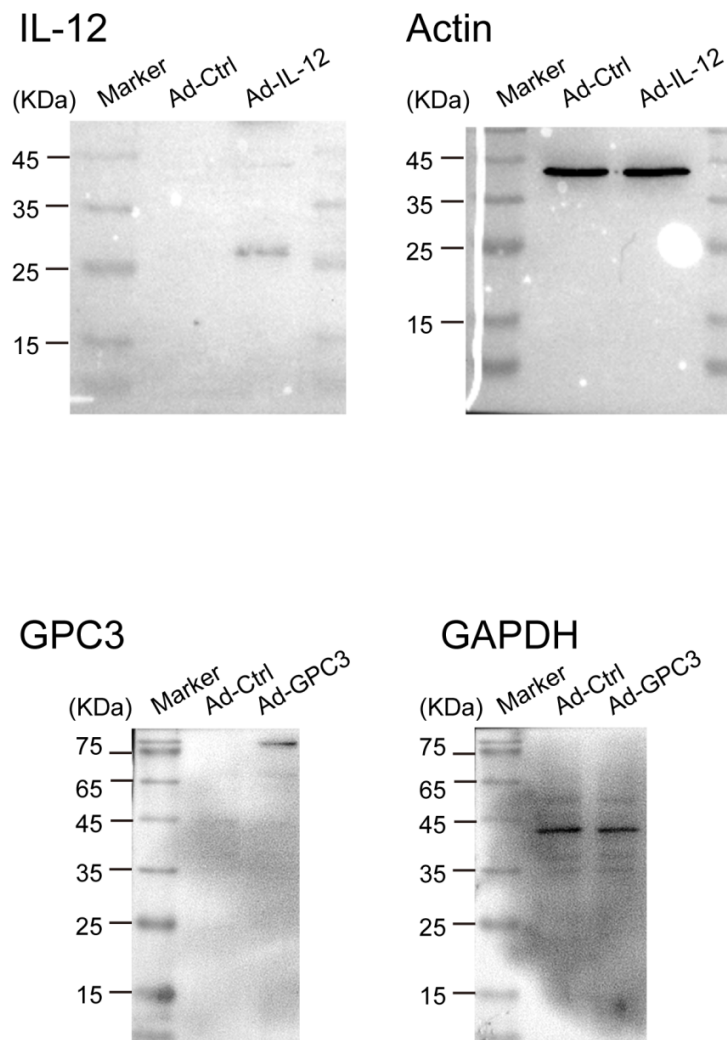

Supplement: s1 [file s1]
