# Supplementary material for: Inversion of dispersed Love wave phase velocity data for multiple continuous parameters
Source: MDPI journal article supplement (doi:10.3390/cancers14184512), 1985-01-01
Supplement: s1 [file s1]

Figure. S3. The percentages of CD8<sup>+</sup>CD11c<sup>+</sup> cells were detected in DCs from lung tumor by flow cytometry.

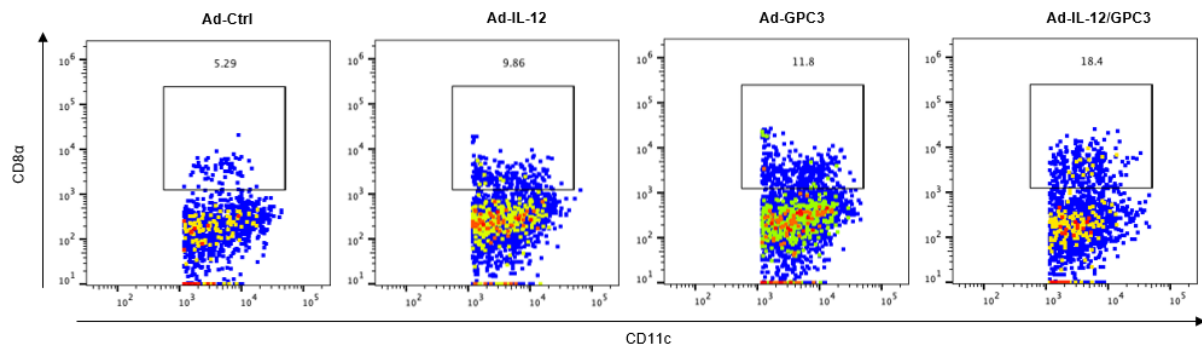

Mice were sacrificed on day 28 after tumor inoculation, and the frequencies of CD8<sup>+</sup>CD11c<sup>+</sup> cells by gating CD11c<sup>+</sup> cells in TILs from the lung tumor tissues of various vaccine groups were analyzed. Each group showed the results of a representative experiment.
