# Supplementary material for: Inversion of dispersed Love wave phase velocity data for multiple continuous parameters
Source: MDPI journal article supplement (doi:10.3390/cancers14184512), 1985-01-01
Supplement: s1 [file s1]

Table S1: The densitometry readings/relative intensity of each band of the densitometry scans.

|               | Lan1-1  | Lan2-1  | Lan1-2  | Lan2-2  | Lan1-3  | Lan2-3  |
|---------------|---------|---------|---------|---------|---------|---------|
| m-IL-12       | 23.942  | 41.955  | 25.143  | 59.012  | 24.897  | 55.786  |
| Actin         | 119.958 | 116.661 | 132.765 | 124.500 | 117.865 | 151.642 |
| m-IL-12/Actin | 0.200   | 0.360   | 0.189   | 0.474   | 0.211   | 0.368   |
| Lanx/Lan1     | 1.000   | 1.802   | 0.800   | 2.002   | 1.200   | 2.090   |

  

|            | Lan1-1  | Lan2-1  | Lan1-2  | Lan2-2  | Lan1-3  | Lan2-3  |
|------------|---------|---------|---------|---------|---------|---------|
| GPC3       | 161.218 | 145.410 | 169.514 | 154.895 | 195.812 | 176.765 |
| GAPDH      | 6.052   | 73.950  | 6.516   | 98.970  | 5.786   | 65.830  |
| GPC3/GAPDH | 0.038   | 0.509   | 0.038   | 0.639   | 0.030   | 0.372   |
| Lanx/Lan1  | 0.890   | 12.057  | 1.000   | 16.622  | 1.110   | 13.990  |
