# Supplementary material for: Inversion of dispersed Love wave phase velocity data for multiple continuous parameters
Source: MDPI journal article supplement (doi:10.3390/cancers14184512), 1985-01-01
Supplement: s1 [file s1]

Figure. S2. Tumor infiltration of immune cells was detected by flow cytometry.

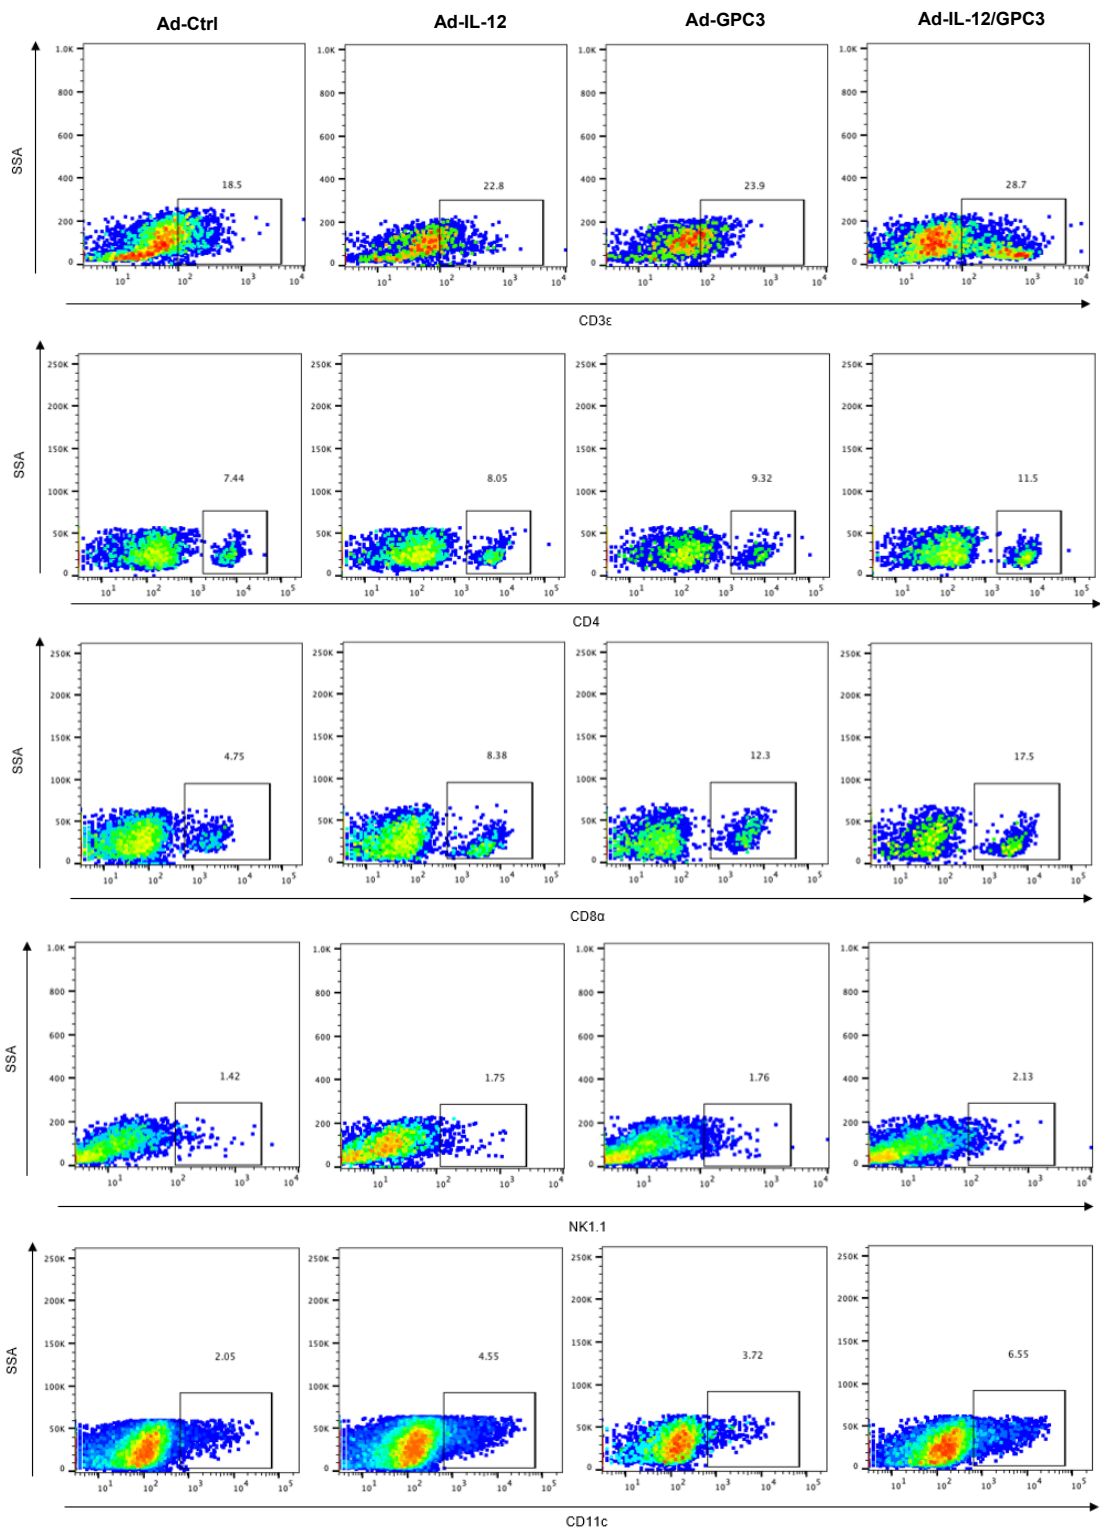

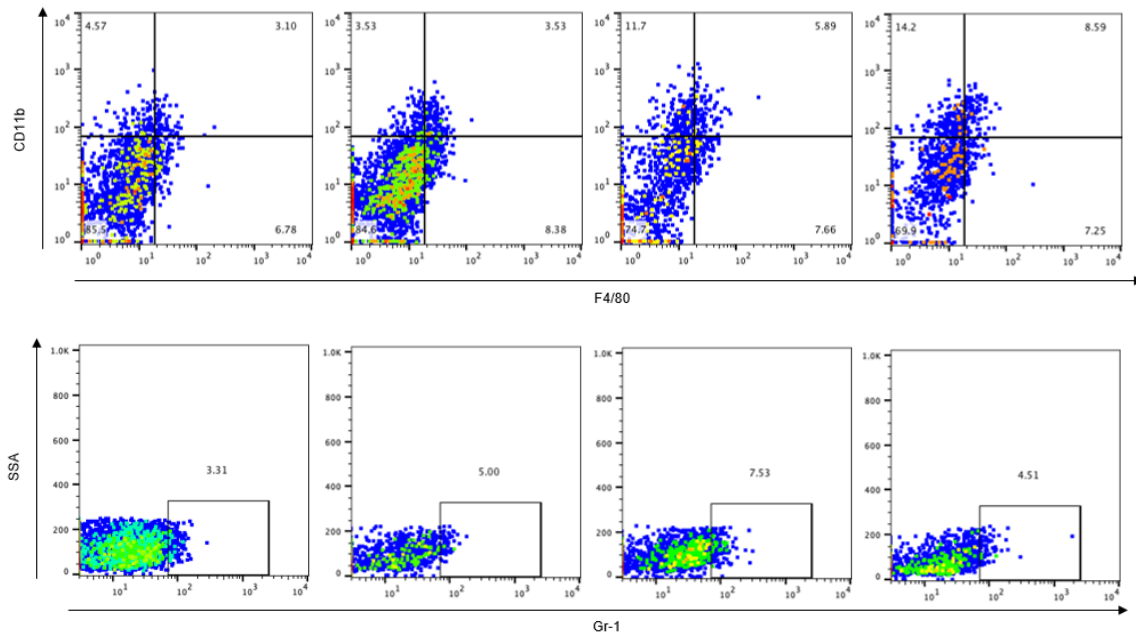

Mice were sacrificed on the 42nd day after tumor inoculation, and the frequencies of T, CD4<sup>+</sup> T, CD8<sup>+</sup> T, NK, DCs, macrophages, or MDSCs were analyzed in TILs of mice. Results from one representative experiment are shown for each group.
